# Supplementary material for: Nitrogen doped graphite felt decorated with porous Ni1.4Co1.6S4 nanosheets for 3D pseudocapacitor electrodes
Source: Royal Society of Chemistry journal article supplement (doi:10.1039/c6ra28083h), 2017-01-01
Supplement: c6ra28083h1.pdf [file c6ra28083h1.pdf]

# Supporting Information

## Nitrogen Doped Graphite Felt Decorated with Porous $\text{Ni}_{1.4}\text{Co}_{1.6}\text{S}_4$ Nanosheets for 3D Pseudocapacitor Electrodes

Xiang Zhang, Yuying Zheng\*, Jun Zhou, Wenqing Zheng, Dongyang Chen\*

*College of Materials Science and Engineering, Fuzhou University, Fuzhou 350116, P. R. China*

E-mails: [yyzheng@fzu.edu.cn](mailto:yyzheng@fzu.edu.cn) (Y. Zheng); [dongyang.chen@fzu.edu.cn](mailto:dongyang.chen@fzu.edu.cn) (D. Chen)

## Table of Contents

|                                                                                                                                                                                                                              |   |
|------------------------------------------------------------------------------------------------------------------------------------------------------------------------------------------------------------------------------|---|
| <b>Figure S1.</b> Raman spectroscopy of the NGF-0-900 NGF-0.06-900, NGF-0.08-900, NGF-0.1-900 and NGF-0.12-900 .....                                                                                                         | 1 |
| <b>Figure S2.</b> CV curves of the NGF-0.06-900, NGF-0.08-900, NGF-0.1-900 and NGF-0.12-900.....                                                                                                                             | 1 |
| <b>Figure S3.</b> Nitrogen adsorption-desorption isotherm of the NGF-0.1-800, NGF-0.1-900 and NGF-0.1-1000 .....                                                                                                             | 2 |
| <b>Figure S4.</b> FT-IR spectrum of the NGF-0.1-900 after acidification .....                                                                                                                                                | 2 |
| <b>Figure S5.</b> CV curves of the NiCo <sub>2</sub> S <sub>4</sub> /NGF, Ni <sub>1.4</sub> Co <sub>1.6</sub> S <sub>4</sub> /NGF and Ni <sub>1.8</sub> Co <sub>1.2</sub> S <sub>4</sub> /NGF at 10 mV s <sup>-1</sup> ..... | 3 |
| <b>Figure S6.</b> CP curves of the NiCo <sub>2</sub> S <sub>4</sub> /NGF, Ni <sub>1.4</sub> Co <sub>1.6</sub> S <sub>4</sub> /NGF and Ni <sub>1.8</sub> Co <sub>1.2</sub> S <sub>4</sub> /NGF at 1 A g <sup>-1</sup> .....   | 3 |
| <b>Figure S7.</b> SEM image of the Ni <sub>1.4</sub> Co <sub>1.6</sub> S <sub>4</sub> /NGF after galvanostatic charge/discharge at a current density of 20 A g <sup>-1</sup> for 2000 cycles.....                            | 4 |
| <b>Figure S8.</b> SEM image of the pure Ni <sub>1.4</sub> Co <sub>1.6</sub> S <sub>4</sub> .....                                                                                                                             | 4 |
| <b>Table S1.</b> Nitrogen contents of the NGF-0.1-800, NGF-0.1-900, and NGF-0.1-1000.....                                                                                                                                    | 5 |
| <b>Table S2.</b> BET specific surface areas, BJH pore volume and pore diameter of the NGF-0.1-800, NGF-0.1-900, and NGF-0.1-1000 .....                                                                                       | 5 |

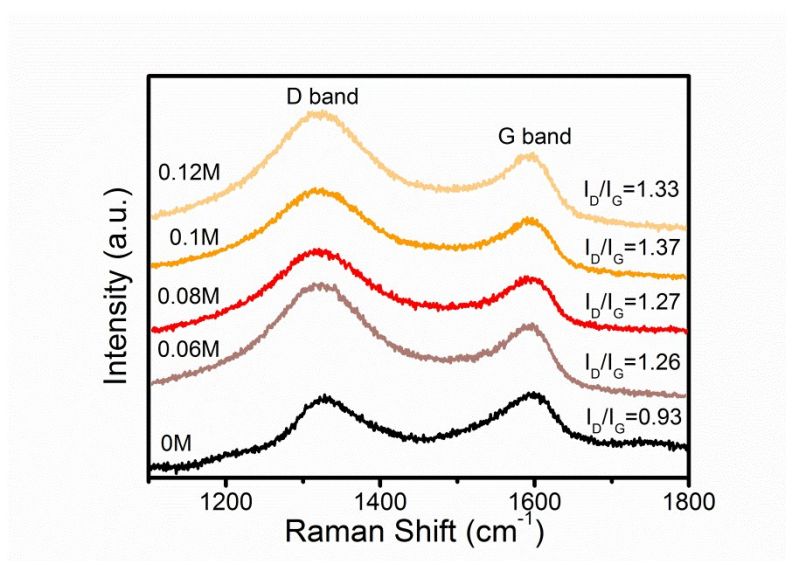

**Figure S1.** Raman spectroscopy of the NGF-0.06-900, NGF-0.08-900, NGF-0.1-900 and NGF-0.12-900. The broad peaks of D band and the highest  $I_D / I_G$  value (1.37) of the NGF-0.1-900 indicate a largest degree of defects in NGF-0.1-900 compared to other samples.

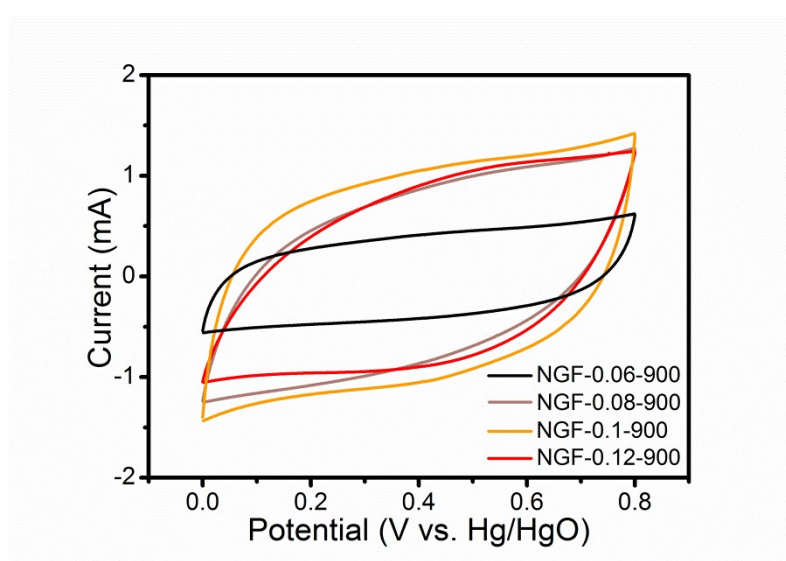

**Figure S2.** CV curves of the NGF-0.06-900, NGF-0.08-900, NGF-0.1-900 and NGF-0.12-900. The largest enclosed area of the NGF-0.1-900 represents highest capacity.

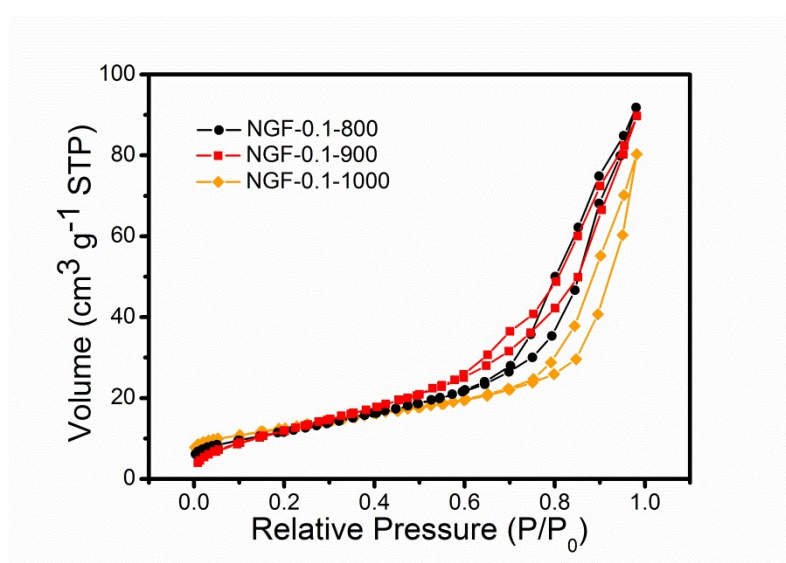

**Figure S3.** Nitrogen adsorption-desorption isotherm of the NGF-0.1-800, NGF-0.1-900 and NGF-0.1-1000. The hysteresis loops suggest the mesoporous property of all samples.

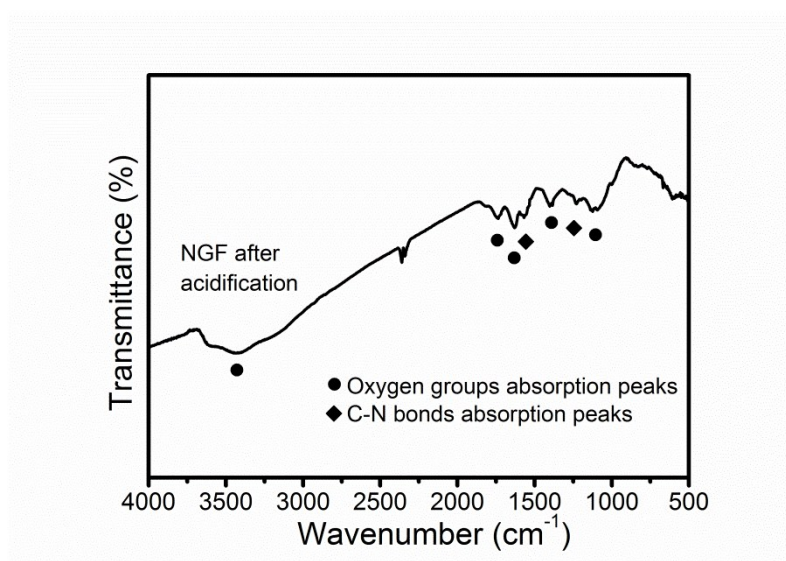

**Figure S4.** FT-IR spectrum of the NGF-0.1-900 after acidification. The appearance of the oxygen groups absorption peaks demonstrates the successful acidification of the NGF.

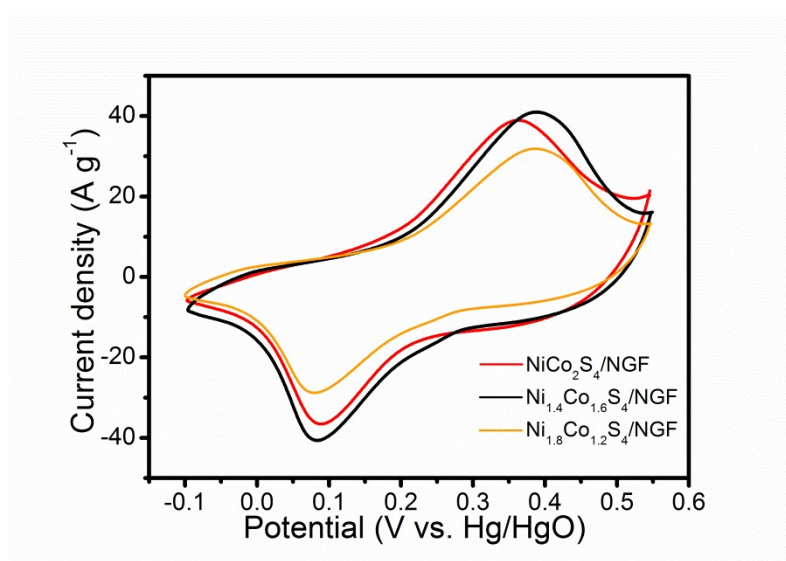

**Figure S5.** CV curves of the  $\text{NiCo}_2\text{S}_4/\text{NGF}$ ,  $\text{Ni}_{1.4}\text{Co}_{1.6}\text{S}_4/\text{NGF}$  and  $\text{Ni}_{1.8}\text{Co}_{1.2}\text{S}_4/\text{NGF}$  at  $10 \text{ mV s}^{-1}$ . The highest redox peaks position along with the largest enclosed area indicate the best electrochemical performance when the molar ratio of Ni : Co is 1.4 : 1.6.

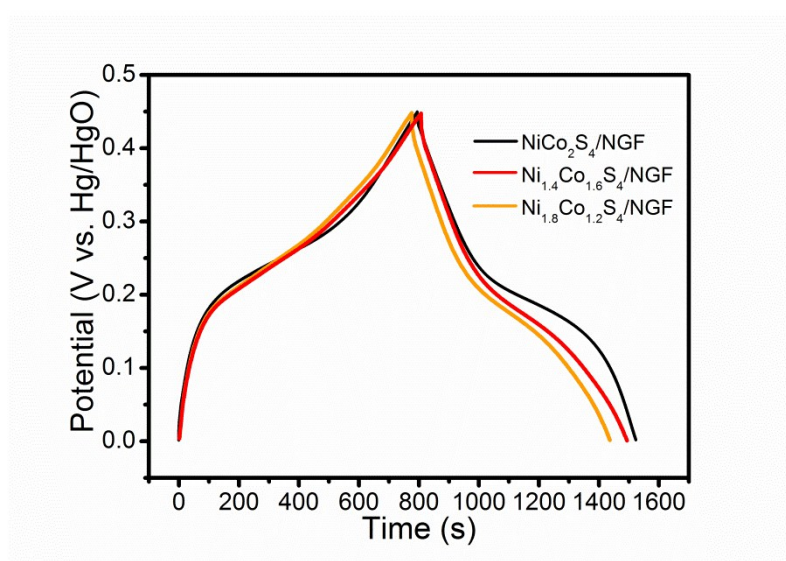

**Figure S6.** CP curves of the  $\text{NiCo}_2\text{S}_4/\text{NGF}$ ,  $\text{Ni}_{1.4}\text{Co}_{1.6}\text{S}_4/\text{NGF}$  and  $\text{Ni}_{1.8}\text{Co}_{1.2}\text{S}_4/\text{NGF}$  at  $1 \text{ A g}^{-1}$ . This data indicates that the specific capacitance of the  $\text{Ni}_{1.4}\text{Co}_{1.6}\text{S}_4/\text{NGF}$  is the largest compared to those of the other samples on account of the longest discharge time.

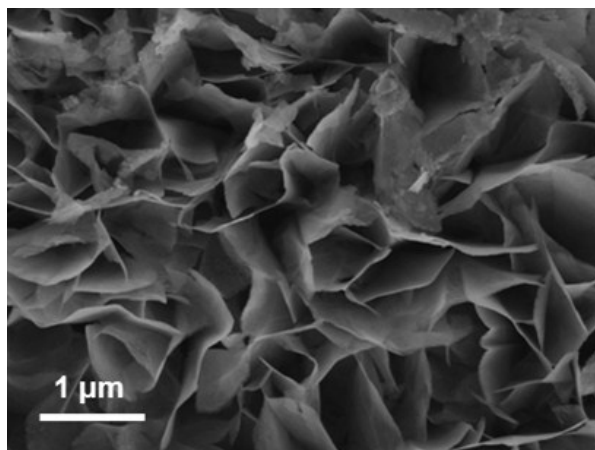

**Figure S7.** SEM image of the  $\text{Ni}_{1.4}\text{Co}_{1.6}\text{S}_4/\text{NGF}$  after galvanostatic charge/discharge at a current density of  $20 \text{ A g}^{-1}$  for 2000 cycles. The interconnected sheet-like morphology was well maintained and there only generated a small range of collapse.

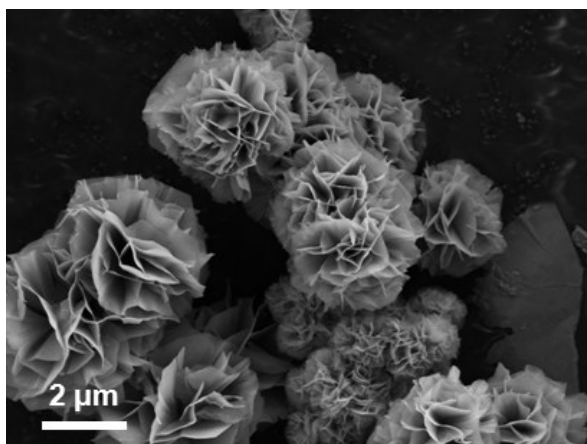

**Figure S8.** SEM image of the pure  $\text{Ni}_{1.4}\text{Co}_{1.6}\text{S}_4$ . A wide range of size distribution can be observed.

**Table S1.** Nitrogen contents of the NGF-0.1-800, NGF-0.1-900, and NGF-0.1-1000.

| Electrode    | Nitrogen content (%) |            |             |
|--------------|----------------------|------------|-------------|
|              | Graphitic-N          | Pyrrolic-N | Pyridinic-N |
| NGF-0.1-800  | 10.9                 | 89.1       | 0           |
| NGF-0.1-900  | 65.6                 | 12.6       | 21.8        |
| NGF-0.1-1000 | 74.6                 | 18.2       | 7.2         |

**Table S2.** BET specific surface area, BJH pore volume and pore diameter of the NGF-0.1-800, NGF-0.1-900, and NGF-0.1-1000.

| Electrode    | BET specific                                | BJH pore volume                 | BJH pore diameter |
|--------------|---------------------------------------------|---------------------------------|-------------------|
|              | surface area ( $\text{m}^2 \text{g}^{-1}$ ) | ( $\text{cm}^3 \text{g}^{-1}$ ) | (nm)              |
| NGF-0.1-800  | 56.78                                       | 0.13                            | 3.42              |
| NGF-0.1-900  | 47.15                                       | 0.16                            | 3.84              |
| NGF-0.1-1000 | 41.42                                       | 0.17                            | 4.17              |
